# 1      **Transient demographic approaches can drastically expand the toolbox of** 2                                      **coral reef science**

3

4                                      James Cant<sup>1,\*</sup>, Roberto Salguero-Gómez<sup>2,3,4,\*,\*\*</sup>, Maria Beger<sup>1,3,\*,\*\*</sup>

5                      1. School of Biology, Faculty of Biological Sciences, University of Leeds, Leeds, LS2 9JT United Kingdom.

6                      2. Department of Zoology, University of Oxford, Oxford, 11a Mansfield Rd, OX1 3SZ United Kingdom.

7                      3. Centre for Biodiversity and Conservation Science, School of Biological Sciences, University of Queensland, Brisbane, QLD, 4072  
8                      Australia.

9                      4. Max Planck Institute for Demographic Research, Konrad Zuße Straße 1, 18057 Rostock, Germany.

10                    \* Corresponding authors:

11                    James Cant: [bsjic@leeds.ac.uk](mailto:bsjic@leeds.ac.uk), Roberto Salguero-Gómez: [rob.salguero@zoo.ox.ac.uk](mailto:rob.salguero@zoo.ox.ac.uk) & Maria Beger: [M.Beger@leeds.ac.uk](mailto:M.Beger@leeds.ac.uk)

12                    \*\* Shared senior authors

13

14

## 15      **Word Counts:**

16                    Abstract: 133, Main text: 3137, Figures: 4, Box 1: 345, Box 2: 317, References: 97.

17

18

19

20

21

22

23

24 **Abstract**

25 Coral communities are threatened by an increasing plethora of abiotic and biotic disturbances.  
26 Preventing the ensuing loss of coral coverage and diversity calls for a mechanistic  
27 understanding of resilience across coral species and populations that is currently lacking in  
28 coral reef science. Assessments into the dynamics of coral populations typically focus on their  
29 long-term (*i.e. asymptotic*) characteristics, tacitly assuming stable environments in which  
30 populations can attain their long-term characteristics. Instead, we argue that greater focus is  
31 needed on investigating the *transient* (*i.e. short-term*) dynamics of coral populations to describe  
32 and predict their characteristics and trajectories within unstable environments. Applying  
33 transient demographic approaches to the evaluation and forecasting of the responses of coral  
34 populations to disturbance holds promise for expediting our capacity to predict and manage the  
35 resilience of coral populations, species, and communities.

36

37 **Keywords:**

38 Asymptotic dynamics, Population dynamics, Reef Conservation, Resilience, Short-term  
39 characteristics.

40

41

42

43

44

45

## 46 **Introduction**

47 Coral populations are sensitive to a range of biotic and abiotic pressures (Riegl 2020), many of  
48 which will be exacerbated by future climatic change and human exploitation (Wolff et al. 2018;  
49 Riegl and Glynn 2020). The future resilience of coral populations subsequently comprises their  
50 capacity for enduring, and recovering from, this increased disturbance (Holling 1973).  
51 Accordingly, a resilience-orientated focus is becoming commonplace in reef management  
52 (McLeod et al. 2019; McLeod et al. 2021), although this requires the ability for anticipating the  
53 responses of coral populations to varying biotic and abiotic regimes (Lam et al. 2020).  
54 Appropriately, state-structured demographic models are being increasingly utilised for  
55 quantifying the mechanisms supporting or preventing the persistence and revival of disturbed  
56 coral communities (e.g. Kayal et al. 2018; Cant et al. 2021). Indeed, understanding how  
57 patterns in the survival, size, and reproduction of individual colonies influences population-  
58 level characteristics is paramount for effectively managing conservation resources (Riegl et al.  
59 2018; Pisapia et al. 2020). However, the contemporary application of state-structured  
60 demographic approaches to ascertain the viability of coral populations does not reflect our need  
61 to evaluate their resilience.

62         Structured population approaches examine how variation at the level of individuals  
63 translates to population-level attributes (Caswell 2001). The state of individuals (typically their  
64 size, age, or developmental stage [Caswell 2001]) arbitrates their survival and reproduction,  
65 which in turn shape the responses of their population to local biotic and abiotic conditions  
66 (Benton et al. 2006). Within natural populations, the diversity of individual-level  
67 characteristics can be expressed through the state-structured vital rates of survival, progression  
68 (growth & development), retrogression (shrinkage [Salguero-Gómez and Casper 2010] &  
69 rejuvenation [Salguero-Gómez et al. 2013]), and reproduction (Metcalf and Pavard 2007).  
70 Patterns across these vital rates, and their response to changing population structures,

71 subsequently underpin the characteristics of populations and define their capacity for tolerating  
72 various environments (Boyce et al. 2006; Ehrlén et al. 2016). Equally, combined with an  
73 explicit consideration for the interaction between multiple populations, structured population  
74 analyses also facilitate the exploration of community recovery (Kayal et al. 2018) and  
75 coexistence (Adler et al. 2010). Evaluating the vital rates and structure of numerous  
76 populations, and their association with abiotic regimes, has thus proven instrumental in  
77 calculating the extinction risk of highly threatened populations (Mace et al. 2008), and the  
78 management, and conservation of natural communities (Morris and Doak 2002; Jongejans et  
79 al. 2008).

80         With many coral communities facing imminent reassembly and population collapse,  
81 the demand for an improved understanding of coral population dynamics has never been greater  
82 (Edmunds and Riegl 2020). Although limited, the application of demographic theory within  
83 coral research is not a novel concept (Edmunds et al. 2014). Veritably, there is a growing  
84 appreciation for how the size structure of coral populations influences their dynamics and  
85 endurance, with recent appeals for demographic approaches to be concentrated towards  
86 gauging the resilience of coral communities (Dietzel et al. 2020; Pisapia et al. 2020; Cant et al.  
87 2021; Lachs et al. 2021). However, prevailing knowledge of coral population dynamics centres  
88 around isolated patterns in colony survival, changes in size, or recruitment, and long-term  
89 (*asymptotic*) population characteristics. Quantifying the asymptotic characteristics of various  
90 populations presents a valuable comparative tool for exploring abiotic tolerances (Beissinger  
91 and Westphal 1998). Yet, to achieve their asymptotic dynamics, populations typically require  
92 stable conditions, which seldom occur naturally, and are becoming increasingly unlikely given  
93 current climate projections (Hastings et al. 2018; Francis et al. 2021). Consequently, a focus  
94 towards exploring the asymptotic characteristics of populations limits our appreciation of their

95 dynamics within natural environments (Ezard et al. 2010), and will inhibit our capacity to  
96 accurately predict the future condition of global coral assemblages.

97       Cyclic abiotic and biotic disturbances (e.g. seasonality in temperature or resource  
98 availability) ensure that natural environments rarely exist at a stable equilibrium (Williams et  
99 al. 2011). The perpetual instability generated by regular disturbances ensures that natural  
100 populations rarely attain their asymptotic trajectories (Hastings 2001; Hastings et al. 2018).  
101 Instead, the short-term or *transient* characteristics of populations, which reflect their dynamics  
102 within non-equilibrate environments, play a fundamental role in the assembly of biological  
103 communities (Hastings 2004). With the transient dynamics of populations defining their  
104 performance following disturbance, these characteristics also represent quantifiable measures  
105 of population resilience (Capdevila et al. 2020). Globally, coral communities are being exposed  
106 to increasingly recurrent disturbance events (Hughes et al. 2018), with various species shifting  
107 their distributions poleward or establishing populations within marginal habitats (Beger et al.  
108 2014; Camp et al. 2018; Vergés et al. 2019). Here, we discuss why enhancing our capacity for  
109 anticipating the future resilience of coral communities requires an understanding of the  
110 transient dynamics in their constituent populations.

### 111 **Transient *versus* asymptotic population dynamics**

112 Population dynamics characterise and define the trajectories of populations according to the  
113 individual-level allocation of resources towards survival, changes in size (or the state of  
114 interest), and reproduction (Box 1). Any population can be structured according to the  
115 distribution of its individuals across some state variable, be that age, size, developmental stage,  
116 or a combination. The transition of individuals across state classes is, in turn, mediated by  
117 selection gradients that emerge from the state-specific patterns of survival and reproduction  
118 (Groenendael et al. 1988; van Tienderen 2000). In state-structured demography, patterns across

### **Box 1: Scaling from individuals to communities.**

Following individual corals over time facilitates the calculation of vital rate patterns relating to colony survival, size, and reproduction, and how they govern the characteristics of populations and their wider community interactions (Fig. I). As corals mature and grow, they experience changes in their resource demands, with the capacity of corals for continually meeting these changing demands subsequently influencing their ability to maintain their somatic condition and tolerate local biotic and abiotic stressors (Hughes 1984). The repeated survey of individual colonies allows for documenting how the size of individuals regulates their survival, development, and reproductive contribution over time, and how this is shaped by changing environmental conditions. Condensing these temporal observations from across multiple tagged colonies then allows population ecologists to explore how individual-level vital rates underpin the dynamics of populations.

Crucially, state-structured demographic approaches enable the quantification of the relationship between abiotic conditions and population-level characteristics. Such an understanding is necessary if ecologists are to accurately predict the impact of recurrent disturbances and simulate populations under varying climate scenarios. Similarly, by understanding interactions across the dynamics of various co-occurring populations, and their differential responses to changing conditions, ecologists can better understand the mechanisms driving coexistence (Adler et al. 2010), and predict the transition of coral communities amidst changing climatic conditions (Hughes 1996; Kayal et al. 2018; Cant et al. 2021). Indeed, although more time consuming, demographic approaches transcend the correlative techniques previously used for evaluating the viability of coral populations and communities, and for predicting their resilience to future climatic stressors (Edmunds et al. 2014; Edmunds and Riegl 2020).

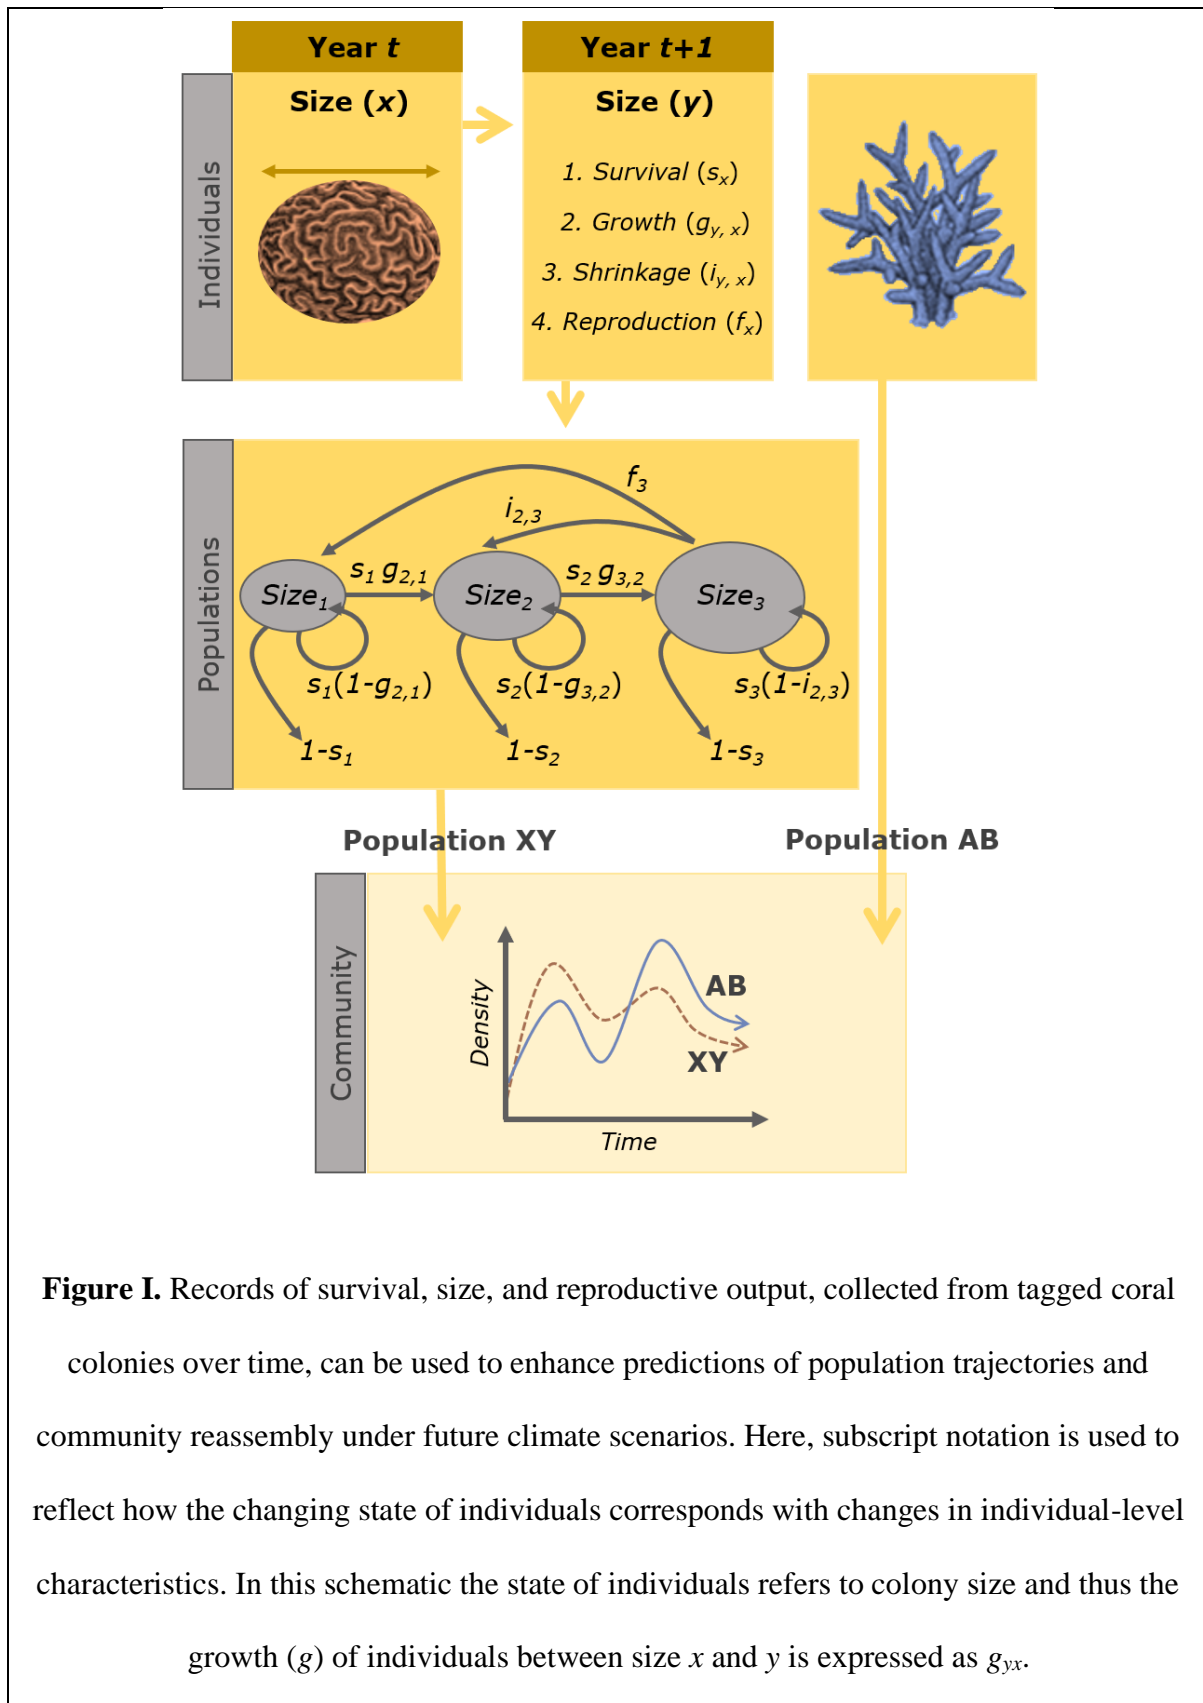

120 these multiple vital rates can subsequently be condensed into a population projection matrix  
121 ( $\mathbf{A}$ ), with each matrix element ( $a_{ij}$ ) expressing the expected transition of individuals into state  
122 class  $i$  from state class  $j$  during the time interval  $t$  to  $t+I$ , or the per-capita a/sexual contributions  
123 of state  $j$  individuals into state class  $i$  during that same interval (Caswell 2001). This population  
124 matrix can then be used to project the size of a population ( $N$ , number of individuals) over time,  
125 using the change in its state structure ( $\mathbf{n}$ ):

$$126 \quad N_{t+1} = \sum \mathbf{n}_{t+1} = \sum \mathbf{A} \mathbf{n}_t. \quad (1)$$

127 Within a stable environment, the state structure of a population is expected to converge towards  
128 an equilibrium state (Caswell 2001). At equilibrium, the size of a population is then expected  
129 to change at a constant rate over time, termed its asymptotic population growth rate ( $\lambda$ , Caswell  
130 2001). The value of  $\lambda$ , for any state-structured population, is equal to the dominant eigenvalue  
131 of its corresponding population matrix  $\mathbf{A}$ . Estimates of  $\lambda$  represent the proportional change in  
132 the size of populations over time, and exist on a non-negative scale reflecting population  
133 growth ( $\lambda > 1$ ), decline ( $\lambda < 1$ ), or stasis ( $\lambda = 1$ ).

134 Crucially, though, with populations rarely exposed to stable conditions or equilibria,  
135 deterministic estimates of  $\lambda$  are unlikely to represent a true reflection of a population's  
136 trajectory (Boyce 1992; Beissinger and Westphal 1998). To achieve their asymptotic growth  
137 rate populations require a stable population structure, at which their vital rate patterns will  
138 maintain a consistent distribution of individuals across state classes over time (Caswell 2001).  
139 Yet, for their stable structure to manifest, populations typically require time in a constant  
140 environment to allow the state distribution of individuals to convergence towards equilibrium,  
141 without displacement by local disturbances (Fig 1; Bierzychudek 1999). Additionally, the vital  
142 rate patterns used in constructing population projection matrices are themselves not consistent,  
143 and contingent on the environmental conditions in which they are observed (Benton and Grant



144 1996; Boyce et al. 2006). Equally, as populations change in size their dynamics are subject to  
145 density–dependant processes that regulate their trajectories within shared environments (Engen  
146 et al. 1998; Lande et al. 2003). Thus the dynamics of populations can be expected to vary over  
147 time as environmental conditions change (Tuljapurkar and Orzack 1980; Tuljapurkar 1989).

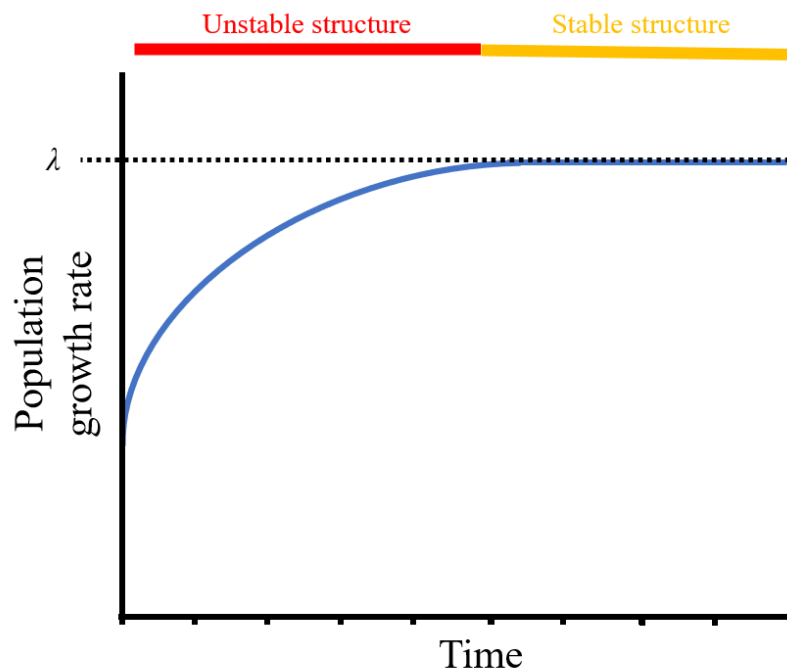

148 **Figure 1.** At stationary equilibrium, populations are expected to change size at a constant  
149 rate, termed their asymptotic growth rate ( $\lambda$ ). However, to display asymptotic characteristics,  
150 populations need a stable state structure and so require time at equilibrium to enable the  
151 development of this stable structure. In the absence of a stable state structure, populations  
152 will display varying growth rates as they converge towards asymptotic expectations, even  
153 within equilibrate environments. Note that, although in this schematic the populations growth  
154 rate is increasing towards its asymptotic trajectory, estimates of  $\lambda$  can also reflect asymptotic  
155 decline.

156

157 Recurrent perturbations prevent populations from acquiring, or preserving, a stable  
158 state structure (Bierzychudek 1999; Williams et al. 2011). Instead, environments persist within

159 a non-equilibrate condition maintaining populations within a transient state during which their  
160 trajectories can radically differ from asymptotic expectations (Stott et al. 2010, 2011; Hastings  
161 et al. 2018). Accordingly, anticipating the future condition and endurance of populations  
162 requires an awareness for their transient characteristics (Box 2; Ezard et al. 2010). Moreover,  
163 with the transient characteristics of populations reflecting their response to disturbance and  
164 instability, they represent quantifiable measures of population resilience (Capdevila et al.  
165 2020). Transient shifts in the state structure of populations can elevate (*amplification*) or  
166 diminish (*attenuation*) their growth rates relative to asymptotic projections (Townley et al.  
167 2007). Equally, for populations existing in a transient state, there is a natural tendency for their  
168 state structure to converge towards a stable structure (Caswell 2001). Intuitively, with  
169 population resilience comprised of the attributes of *resistance* (the ability to withstand  
170 disturbances), *compensation* (the ability to benefit from disturbances) and *recovery* (the speed  
171 and ability to reattain stability), the transient characteristics of populations resemble these  
172 features of resilience (Hodgson et al. 2015; Capdevila et al. 2020).

**Box 2: Measuring transient population characteristics.**

Within natural environments, abiotic and biotic perturbations generate constant shifts within the state structure of populations ensuring they persist within a transient state, rather than converging towards equilibrium (Hastings et al. 2018). Within this transient state, the growth rate of populations can differ dramatically from their asymptotic trajectories, with populations undergoing *amplification* (increases in growth rate) or *attenuation* (declines in growth rate), which can subsequently influence the viability of a population in the longer-term (Fig. II). Accordingly, it is necessary to explore the transient characteristics of populations to gain insights into their responses to disturbance, and therefore better

understand their resilience (Ezard et al. 2010; Capdevila et al. 2020). Evaluating the transient dynamics of populations is made possible through the calculation of transient indices from population projection matrices (Stott et al. 2011). These measures include population reactivity ( $\bar{\rho}$ ) and first-timestep attenuation ( $\underline{\rho}$ ) which describe the increase or decline in a population's growth rate within one time interval of a perturbation, relative to  $\lambda$  (Stott et al. 2011). Equally, the measures of maximal amplification ( $\bar{\rho}_{max}$ ) and maximal attenuation ( $\underline{\rho}_{max}$ ) can be used to evaluate the maximum amplification or attenuation expected in the growth rate of populations, relative to  $\lambda$  (Townley et al. 2007; Townley and Hodgson 2008).

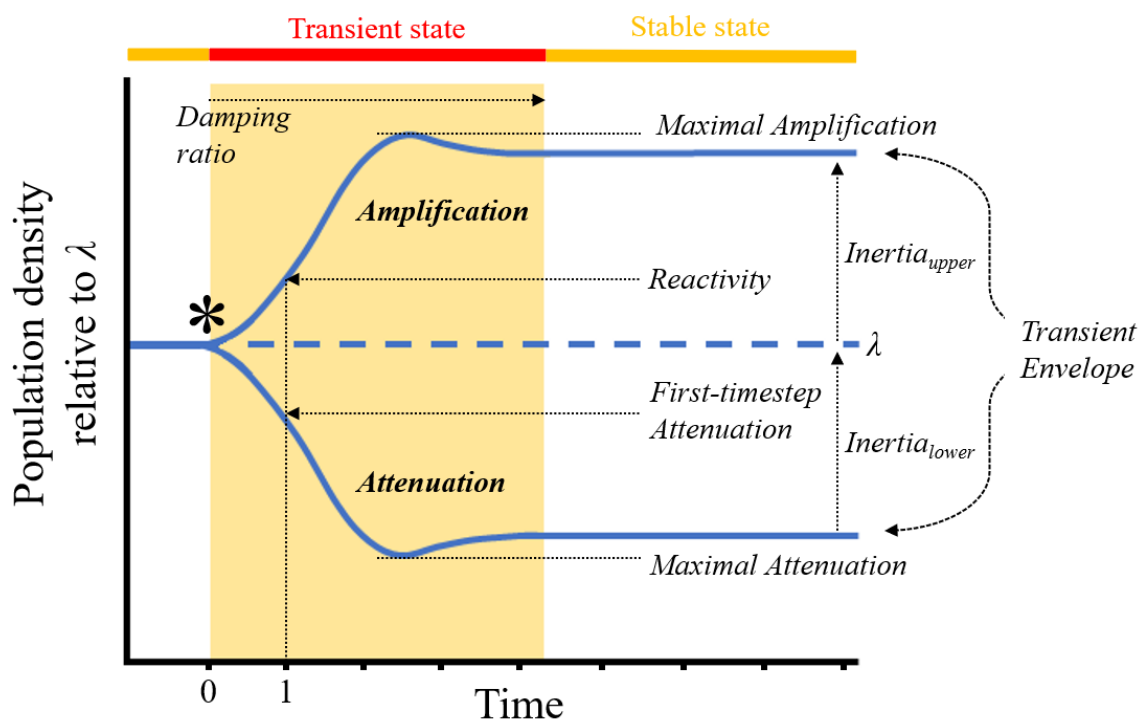

**Figure II.** Various measures exist for quantifying the transient characteristics of populations, and how the short-term responses of populations following a disturbance (\*) will modify their trajectories relative to asymptotic expectations.

The *damping ratio* ( $\rho$ ) of a population defines the rate at which a population will converge back to a stable equilibrium following a perturbation to its stable structure (Caswell 2001). Finally, *upper & lower population inertia* ( $Inertia_{upper}$  &  $Inertia_{lower}$  respectively) can be used to explore the extent to which the transient characteristics of populations influence their long-term trajectories, also known as a population's *transient envelope* ( $TE$ ) (Koons et al. 2005; Stott et al. 2011).

173

174           Evaluating the transient characteristics of populations, and therefore their demographic  
175 resilience, is possible through the calculation of transient measures readily accessible from  
176 population projection matrices (Box 2; see Stott et al. [2011] for a detailed review). Briefly,  
177 measures of *reactivity* ( $\bar{\rho}$ ) and *first-timestep attenuation* ( $\underline{\rho}$ ) reflect the initial behaviour in a  
178 population's growth rate following a perturbation, with the *damping ratio* ( $\rho$ ) describing the  
179 rate at which a population is expected to reacquire a stable state structure (Caswell 2001; Stott  
180 et al. 2011). Alternatively, estimates of *maximal amplification* ( $\bar{\rho}_{max}$ ), *maximal attenuation*  
181 ( $\underline{\rho}_{max}$ ), and *population inertia* ( $Inertia_x$ ) illustrate the magnitude by which the growth rate of  
182 a population can be expected to fluctuate, and the influence of this short-term variation on the  
183 population's long-term trajectory (Koons et al. 2005; Townley et al. 2007; Stott et al. 2011).  
184 Furthermore, with population projection matrices providing a link between each transient  
185 characteristic and a population's vital rates, sensitivity analyses can be applied to evaluate the  
186 mechanistic drivers underlying the short-term characteristics of populations (Stott 2016;  
187 Caswell 2019). Overall, transient demographic approaches present an effective tool for  
188 explicitly evaluating the resilience of natural populations (Capdevila et al. 2020), and have  
189 proven instrumental in our understanding of the establishment of populations within new and  
190 variable environments (Iles et al. 2016; McDonald et al. 2016, 2017; Jelbert et al. 2019).

## 191 **Coral population dynamics: Current knowledge**

192 To examine the advancement of state-structured population approaches within coral research,  
193 we conducted a review of the relevant ecological literature. Specifically, we searched for the  
194 term coral\* AND demograph\* across the titles, abstracts, and keywords of research literature  
195 within the SCOPUS database. We applied our search across all indexed peer-reviewed journals  
196 published between 1960 and 2020, inclusive. This search initially returned 781 studies, from  
197 which we retained all studies that explicitly measured or quantified state-structured patterns in  
198 the survival, size transitions (including shrinkage via partial mortality or fission), and/or  
199 reproduction (e.g. fecundity) of coral colonies. We also retained studies measuring larval  
200 settlement rates, as the recruitment of early life stage individuals is a key demographic aspect  
201 within coral communities (Adjerdou et al. 2017). Following this refinement, we retained a total  
202 of 145 studies (~19% of our original search), which we then categorised according to whether  
203 they involved the presentation of (i) asymptotic dynamics/simulations, (ii) transient  
204 characteristics, or (iii) an assessment of vital rate patterns only.

205 Following the seminal work of Hughes and Jackson (1980), the application of state-  
206 structured demographic assessments has increased within coral research, with a particularly  
207 rapid growth in popularity since 2007 (Fig. 2). However, much of this research (97%) has  
208 focused on either exploring the asymptotic dynamics of coral populations (34%; 50 studies) or  
209 solely evaluating patterns across one or more of the vital rates of survival, changes in size, or  
210 reproduction (63%; 91 studies). Presently, the majority of knowledge regarding the dynamics  
211 of coral populations centres around their long-term trajectories. Thus, our current  
212 understanding regarding the dynamics of coral populations assumes that these populations will  
213 experience the stable environments necessary for achieving optimum population structures.

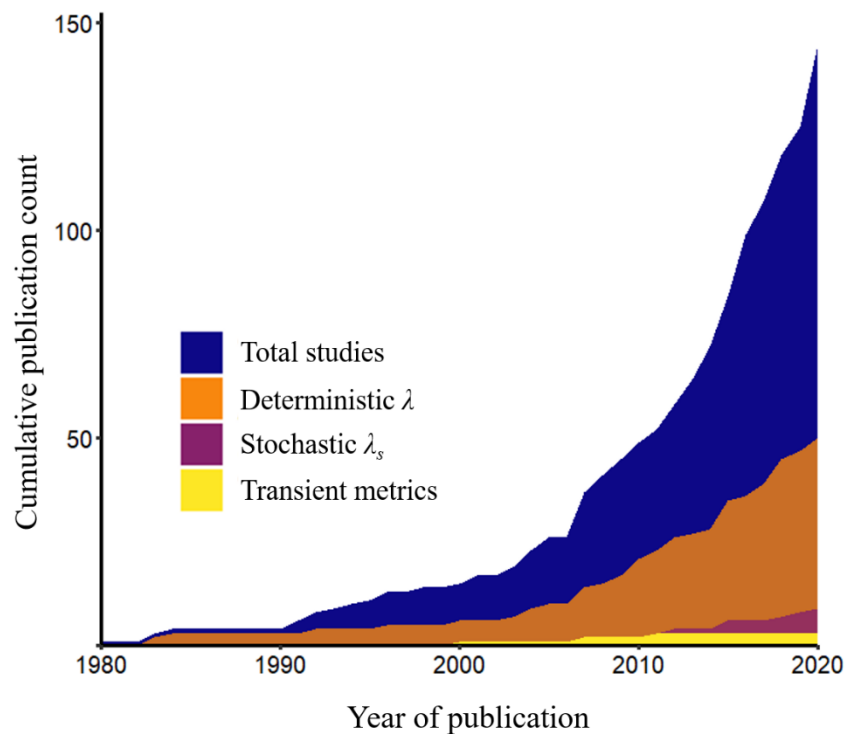

214 **Figure 2.** The cumulative number of studies that explicitly explore the state-structured  
215 demographics of coral populations as identified by our search for the term coral\* AND  
216 demograph\* across the peer-reviewed literature within the SCOPUS database. The colour  
217 scale differentiates between studies that focus on only investigating patterns in colony  
218 survival, growth, and/or reproduction, and those that utilised estimates of either deterministic  
219 population growth ( $\lambda$ ), stochastic asymptotic characteristics ( $\lambda_s$ ), or transient population  
220 characteristics, to evaluate the dynamics of coral populations.

221

222 A limited amount of previous research has considered the unpredictable nature of  
223 natural environments when evaluating the future trajectories of coral populations. Our search  
224 identified nine studies that either included estimates of stochastic population growth ( $\lambda_s$ ;  
225 Lewontin and Cohen 1969) or explicitly parameterised the density-dependant regulation of  
226 vital rates within their population models (Fig. 2; see Linares et al. 2007; Linares and Doak

227 2010; Hernandez-Pacheco et al. 2011; Vardi et al. 2012; Bramanti et al. 2015; Mercado-Molina  
228 et al. 2015; Kayal et al. 2018; Montero-Serra et al. 2019). Estimates of  $\lambda_s$  describe the average  
229 periodic change in the size of a population over a series of successive time intervals (Engen  
230 and Saether 1998). As such, this metric of population performance provides a more accurate  
231 consideration of vital rate and environmental variation when evaluating future population  
232 trajectories, compared to deterministic  $\lambda$ . However, with estimates of  $\lambda_s$  often derived using a  
233 series of population sizes estimated over numerous time intervals or with initial inconsistent  
234 estimates of population size omitted,  $\lambda_s$  is still fundamentally a long-term measure of population  
235 viability (Ellner and Rees 2007). Consequently, this measure still neglects the short-term  
236 characteristics of populations, and thus our capacity to fully anticipate the future dynamics of  
237 coral populations remains restricted.

238         Whilst state-structured demographic approaches are being adopted within coral  
239 research, our review of the literature demonstrates how prominently the assumption of stable  
240 equilibria dominates our understanding of coral population dynamics. Subsequently, we lack  
241 the understanding necessary for accurately projecting the future reassembly and persistence of  
242 coral communities under increasingly recurrent disturbance regimes. Only three of the 145  
243 studies in our literature search calculated measures of the transient characteristics of coral  
244 populations (Fig. 2; see Hughes and Tanner 2000; Linares et al. 2007; Bruno et al. 2011).  
245 Alongside asymptotic population characteristics, these studies estimated population damping  
246 ratios to outline the rate at which their focal populations would converge back to a stable state  
247 structure following a perturbation. Yet, the damping ratio represents a dimensionless,  
248 mathematical property of population projection matrices, and alone is of limited use to  
249 population managers seeking to predict the short term responses of populations to disturbance  
250 (Stott et al. 2011). Forecasting the resilience of coral populations is essential for the future  
251 conservation of various reef communities (Roche et al. 2018; Lam et al. 2020). We have

252 illustrated here, however, that current approaches used in coral population ecology to evaluate  
253 population growth rates do not constitute measures of population resilience. Our understanding  
254 of coral population dynamics needs to be further expanded in order to meet our need for  
255 quantifying the resilience, and responses, of coral communities to increasingly frequent  
256 disturbances.

### 257 **Transient dynamics and the resilience of coral communities**

258 Exploring the transient characteristics of coral populations will enhance our understanding  
259 regarding the future diversity, condition, and resilience, of coral communities. The frequency  
260 of widespread thermal stress events is increasing across global coral communities, and soon  
261 expected to exceed the recovery time required by most coral species (Hughes et al. 2018; Sully  
262 et al. 2019). Presently, considerable value is placed on classifying coral species according to  
263 their morphological and functional traits, with the subsequent categorisation of coral taxa  
264 offering proxies for the vulnerability of various coral communities to said recurrent stress  
265 events (Darling et al. 2012, 2019). Quantifying the relative affinities of different coral  
266 populations for demographic recovery presents the opportunity for justifying these  
267 assumptions; helping to distinguish the species and populations most vulnerable and or resilient  
268 to projected recurrent disturbance regimes.

269 Intuitively, the amplification and attenuation characteristics of populations  
270 simultaneously reflect their stability following a disturbance. However, recognising the  
271 differential attributes of compensation and resistance in different populations is important for  
272 managing the future condition of biological communities (Capdevila et al. 2020). Assessments  
273 of coral communities following repeated disturbances have demonstrated divergent shifts in  
274 species compositions (Adjeroud et al. 2009; Pratchett et al. 2011, 2020). With knowledge of  
275 the capacity for various coral populations to undergo demographic amplification or for



276 avoiding demographic attenuation, we can begin to forecast and anticipate the reassembly of  
277 coral communities, thereby improving the effectiveness of adaptive reef management.  
278 Alternatively, a disturbance does not necessarily imply a negative impact, merely a change to  
279 a system (Pickett and White 1985). Disturbances to the structure of populations can be brought  
280 about by the cessation of a continuous pressure, changes in resource availability, or  
281 establishment within a novel environment. The transient characteristics of populations offer  
282 insights into their invasive potential (Iles et al. 2016), with the ability of natural populations  
283 for undergoing demographic compensation underpinning their capacity for exploiting changes  
284 within their local environments (Jelbert et al. 2019). Accordingly, comprehending and  
285 quantifying demographic compensation within coral populations will aid predicting the  
286 winners and losers in reef communities targeted by conservation initiatives, restoration  
287 strategies, or climate induced range shifts. Assessing coral reef community resilience within  
288 such a framework requires an increased focus on the temporal nature of resilience, a view that  
289 would transcend current approaches of conducting single reef assessments to determine  
290 resilience (Maynard et al. 2015; McLeod et al. 2021).

291         Complexities in the modelling approaches used to explore the dynamics of natural  
292 populations have resulted in these techniques remaining largely overlooked within coral  
293 research (Edmunds et al. 2014). Indeed, parametrising the demographic models needed to  
294 quantify population characteristics requires considerable amounts of data (Ellner et al. 2002).  
295 Although, despite the data demanding nature of state-structured demographic models, the  
296 collection of the necessary data regarding the survival, transitions in size, fragmentation, and  
297 recruitment, of individual coral colonies is possible alongside current reef monitoring efforts  
298 (Edmunds and Riegl 2020). Furthermore, new techniques for analysing the demographic  
299 characteristics of populations structured by a continuous state variable like size (Integral  
300 Projection Models [IPMs; Easterling et al. 2000]) have reduced the data demands of

301 demographic assessments (Ramula et al. 2009). As a result, IPM frameworks are growing in  
302 popularity throughout coral research (e.g. Bruno et al. 2011; Madin et al. 2012; Zychaluk et al.  
303 2012; Elahi et al. 2016; Kayal et al. 2018; Precoda et al. 2018; Scavo Lord et al. 2020; Cant et  
304 al. 2021; Carlot et al. 2021). Finally, studying the dynamics, particularly the transient  
305 characteristics, of coral populations is made increasingly accessible by the development of  
306 demographic analysis packages such as *popdemo* (Stott et al. 2012).

307         It is not our intention to dismiss previous efforts to evaluate the dynamics of coral  
308 populations using asymptotic characteristics. Changes in individual vital rates can of course  
309 have critical repercussions on the dynamics of populations (e.g. Bellier et al. 2018), and  
310 asymptotic characteristics provide valuable insights for the management of threatened  
311 populations (e.g. Johnson et al. 2010). However, as we have illustrated here, the asymptotic  
312 characteristics of populations do not represent indicators of population resilience. Here, we  
313 advocate for a greater commitment towards investigating the transient dynamics of coral  
314 populations that more accurately reflect their dynamics within natural environments (Ezard et  
315 al. 2010; Stott et al. 2011; Capdevila et al. 2020). With changing climatic regimes and increased  
316 anthropogenic interference exposing global reef ecosystems to increasingly frequent  
317 disturbances (Hoegh-Guldberg et al. 2017), evaluating the transient dynamics of coral  
318 populations, and their mechanistic drivers, will provide a new effective lens on coral reef  
319 resilience.

## 320 **Acknowledgements**

321 The authors would like to thank D. Ceccarelli for her comments on early drafts of this  
322 manuscript. This work was supported by a NERC DTP scholarship to JC, and a NERC  
323 Independent Research Fellowship (NE/M018458/1) to RS-G.

## 324 **References**

- 325 Adjeroud M, Kayal M, Penin L (2017) Importance of recruitment processes in the dynamics  
326 and resilience of coral reef assemblages. In: Rossi S., Bramanti L., Gori A., Orejas C.  
327 (eds) *Marine Animal Forests: The Ecology of Benthic Biodiversity Hotspots*. Springer  
328 International Publishing, Cham, pp 549–569
- 329 Adjeroud M, Michonneau F, Edmunds PJ, Chancerelle Y, de Loma TL, Penin L, Thibaut L,  
330 Vidal-Dupiol J, Salvat B, Galzin R (2009) Recurrent disturbances, recovery trajectories,  
331 and resilience of coral assemblages on a South Central Pacific reef. *Coral Reefs* 28:775–  
332 780
- 333 Adler PB, Ellner SP, Levine JM (2010) Coexistence of perennial plants: An embarrassment  
334 of niches. *Ecol Lett* 13:1019–1029
- 335 Beger M, Sommer B, Harrison PL, Smith SDA, Pandolfi JM (2014) Conserving potential  
336 coral reef refuges at high latitudes. *Divers Distrib* 20:1–13
- 337 Beissinger SR, Westphal MI (1998) On the use of demographic models of population  
338 viability in endangered species management. *J Wildl Manage* 62:821–841
- 339 Bellier E, Kéry M, Schaub M (2018) Relationships between vital rates and ecological traits in  
340 an avian community. *J Anim Ecol* 87:1172–1181
- 341 Benton TG, Grant A (1996) How to keep fit in the real world: Elasticity analyses and  
342 selection pressures on life histories in a variable environment. *Am Nat* 147:115–139
- 343 Benton TG, Plaistow SJ, Coulson TN (2006) Complex population dynamics and complex  
344 causation: Devils, details and demography. *Proc R Soc B Biol Sci* 273:1173–1181
- 345 Bierzychudek P (1999) Looking backwards: Assessing the projections of a transition matrix  
346 model. *Ecol Appl* 9:1278–1287
- 347 Boyce MS (1992) Population viability analysis. *Annu Rev Ecol Syst* 23:481–506

- 348 Boyce MS, Haridas C V., Lee CT, Boggs CL, Bruna EM, Coulson T, Doak D, Drake JM,  
349 Gaillard JM, Horvitz CC, Kalisz S, Kendall BE, Knight T, Mastrandrea M, Menges ES,  
350 Morris WF, Pfister CA, Tuljapurkar SD (2006) Demography in an increasingly variable  
351 world. *Trends Ecol Evol* 21:141–148
- 352 Bramanti L, Iannelli M, Fan TY, Edmunds PJ (2015) Using demographic models to project  
353 the effects of climate change on scleractinian corals: *Pocillopora damicornis* as a case  
354 study. *Coral Reefs* 34:505–515
- 355 Bruno JF, Ellner SP, Vu I, Kim K, Harvell CD (2011) Impacts of aspergillosis on sea fan  
356 coral demography: modeling a moving target. *Ecol Monogr* 81:123–139
- 357 Camp EF, Schoepf V, Mumby PJ, Hardtke LA, Rodolfo-Metalpa R, Smith DJ, Suggett DJ  
358 (2018) The future of coral reefs subject to rapid climate change: Lessons from natural  
359 extreme environments. *Front Mar Sci* 5:1–21
- 360 Cant J, Salguero-Gómez R, Kim SW, Sims CA, Sommer B, Brooks M, Malcolm HA,  
361 Pandolfi JM, Begger M (2021) The projected degradation of subtropical coral  
362 assemblages by recurrent thermal stress. *J Anim Ecol* 90:233–247
- 363 Capdevila P, Stott I, Begger M, Salguero-Gómez R (2020) Towards a comparative framework  
364 of demographic resilience. *Trends Ecol Evol* 35:776–786
- 365 Carlot J, Kayal M, Lenihan HS, Brandl SJ, Casey JM, Adjeroud M, Cardini U, Merciere A,  
366 Espiau B, Barneche DR, Rovere A, Hédouin L, Parravicini V (2021) Juvenile corals  
367 underpin coral reef carbonate production after disturbance. *Glob Chang Biol* 1–10
- 368 Caswell H (2001) *Matrix population models: Construction, analysis and interpretation*.  
369 Oxford University Press Inc,
- 370 Caswell H (2019) *Sensitivity Analysis: Matrix Methods in Demography and Ecology*.

- 371 Springer, Cham,
- 372 Darling ES, Alvarez-Filip L, Oliver TA, McClanahan TR, Côté IM (2012) Evaluating life-  
373 history strategies of reef corals from species traits. *Ecol Lett*
- 374 Darling ES, McClanahan TR, Maina J, Gurney GG, Graham NAJ, Januchowski-Hartley F,  
375 Cinner JE, Mora C, Hicks CC, Maire E, Puotinen M, Skirving WJ, Adjeroud M,  
376 Ahmadi G, Arthur R, Bauman AG, Beger M, Berumen ML, Bigot L, Bouwmeester J,  
377 Brenier A, Bridge TCL, Brown E, Campbell SJ, Cannon S, Cauvin B, Chen CA, Claudet  
378 J, Denis V, Donner S, Estradivari, Fadli N, Feary DA, Fenner D, Fox H, Franklin EC,  
379 Friedlander A, Gilmour J, Goiran C, Guest J, Hobbs JA, Hoey AS, Houk P, Johnson S,  
380 Jupiter SD, Kayal M, Kuo C, Lamb J, Lee MAC, Low J, Muthiga N, Muttaqin E, Nand  
381 Y, Nash KL, Nedlic O, Pandolfi JM, Pardede S, Patankar V, Penin L, Ribas-Deulofeu L,  
382 Richards Z, Roberts TE, Rodgers KS, Safuan C, Sala E, Shedrawi G, Sin T, Smallhorn-  
383 West P, Smith JE, Sommer B, Steinberg PD, Sutthacheep M, Tan C, Williams GJ,  
384 Wilson S, Yeemin T, Bruno JF, Fortin M, Krkosek M, Mouillot D (2019) Social-  
385 environmental drivers inform strategic management of coral reefs in the Anthropocene.  
386 *Nat Ecol Evol* 3:1341–1350
- 387 Dietzel A, Bode M, Connolly SR, Hughes TP (2020) Long-term shifts in the colony size  
388 structure of coral populations along the Great Barrier Reef. *Proc R Soc B Biol Sci*  
389 287:1–9
- 390 Easterling MR, Ellner SP, Dixon PM (2000) Size-specific sensitivity: applying a new  
391 structured population model. *Ecology* 81:694–708
- 392 Edmunds PJ, Burgess SC, Putnam HM, Baskett ML, Bramanti L, Fabina NS, Han X, Lesser  
393 MP, Madin JS, Wall CB, Yost DM, Gates RD (2014) Evaluating the causal basis of  
394 ecological success within the scleractinia: an integral projection model approach. *Mar*

- 395 Biol 161:2719–2734
- 396 Edmunds PJ, Riegl B (2020) Urgent need for coral demography in a world where corals are  
397 disappearing. *Mar Ecol Prog Ser* 635:233–242
- 398 Ehrlén J, Morris WF, von Euler T, Dahlgren JP (2016) Advancing environmentally explicit  
399 structured population models of plants. *J Ecol* 104:292–305
- 400 Elahi R, Sebens KP, De Leo GA (2016) Ocean warming and the demography of declines in  
401 coral body size. *Mar Ecol Prog Ser*
- 402 Ellner SP, Fieberg J, Ludwig D, Wilcox C (2002) Precision of population viability analysis.  
403 *Conserv Biol* 16:258–261
- 404 Ellner SP, Rees M (2007) Stochastic stable population growth in integral projection models:  
405 Theory and application. *J Math Biol* 54:227–256
- 406 Engen S, Bakke Ø, Islam A (1998) Demographic and environmental stochasticity - Concepts  
407 and definitions. *Biometrics* 54:840–846
- 408 Engen S, Saether B (1998) Stochastic population models: Some concepts, definitions and  
409 results. *Oikos* 83:345–352
- 410 Ezard THG, Bullock JM, Dalglish HJ, Millon A, Pelletier F, Ozgul A, Koons DN (2010)  
411 Matrix models for a changeable world: The importance of transient dynamics in  
412 population management. *J Appl Ecol* 47:515–523
- 413 Francis TB, Abbott KC, Cuddington K, Gellner G, Hastings A, Lai YC, Morozov A,  
414 Petrovskii S, Zeeman ML (2021) Management implications of long transients in  
415 ecological systems. *Nat Ecol Evol* 1–15
- 416 Groenendaal J van, Kroon H de, Caswell H (1988) Projection matrices in population biology.

- 417 Trends Ecol Evol 3:264–269
- 418 Hastings A (2001) Transient dynamics and persistence of ecological systems. Ecol Lett  
419 4:215–220
- 420 Hastings A (2004) Transients: The key to long-term ecological understanding? Trends Ecol  
421 Evol 19:39–45
- 422 Hastings A, Abbott KC, Cuddington K, Francis T, Gellner G, Lai YC, Morozov A, Petrovskii  
423 S, Scranton K, Zeeman ML (2018) Transient phenomena in ecology. Science (80- )  
424 361:1–9
- 425 Hernandez-Pacheco R, Hernandez-Delgado EA, Sabat AM (2011) Demographics of  
426 bleaching in a major Caribbean reef-building coral: *Montastraea annularis*. Ecosphere  
427 2:1–13
- 428 Hodgson D, McDonald JL, Hosken DJ (2015) What do you mean, “resilient”? Trends Ecol  
429 Evol 30:503–506
- 430 Hoegh-Guldberg O, Poloczanska ES, Skirving W, Dove S (2017) Coral reef ecosystems  
431 under climate change and ocean acidification. Front Mar Sci 4:1–20
- 432 Holling CS (1973) Resilience and stability of ecological systems. Annu Rev Ecol Syst 4:1–23
- 433 Hughes TP (1984) Population Dynamics Based on Individual Size Rather than Age: A  
434 General Model with a Reef Coral Example. Am Nat 123:778–795
- 435 Hughes TP (1996) Demographic Approaches to Community Dynamics: A Coral Reef  
436 Example. Ecology 77:2256–2260
- 437 Hughes TP, Anderson KD, Connolly SR, Heron SF, Kerry JT, Lough JM, Baird AH, Baum  
438 JK, Berumen ML, Bridge TC, Claar DC, Eakin CM, Gilmour JP, Graham NAJ, Harrison

- 439 H, Hobbs JA, Hoey AS, Hoogenboom M, Lowe RJ, Mcculloch MT, Pandolfi JM,  
440 Pratchett M, Schoepf V, Torda G, Wilson SK (2018) Spatial and temporal patterns of  
441 mass bleaching of corals in the Anthropocene. *Science* (80- ) 359:80–83
- 442 Hughes TP, Jackson JBC (1980) Do corals lie about their age? Some demographic  
443 consequences of partial mortality, fission, and fusion. *Science* (80- ) 209:713–715
- 444 Hughes TP, Tanner JE (2000) Recruitment Failure, Life Histories, and Long-Term Decline of  
445 Caribbean Corals. *Ecology* 81:2250–2263
- 446 Iles DT, Salguero-Gómez R, Adler PB, Koons DN (2016) Linking transient dynamics and  
447 life history to biological invasion success. *J Ecol* 104:399–408
- 448 Jelbert K, Buss D, McDonald J, Townley S, Franco M, Stott I, Jones O, Salguero-Gómez R,  
449 Buckley Y, Knight T, Silk M, Sargent F, Rolph S, Wilson P, Hodgson D (2019)  
450 Demographic amplification is a predictor of invasiveness among plants. *Nat Commun*  
451 10:1–6
- 452 Johnson HE, Mills LS, Stephenson TR (2010) Population-specific vital rate contributions  
453 influence management of an endangered ungulate. *Ecol Appl* 20:1753–1765
- 454 Jongejans E, Skarpaas O, Shea K (2008) Dispersal, demography and spatial population  
455 models for conservation and control management. *Perspect Plant Ecol Evol Syst* 9:153–  
456 170
- 457 Kayal M, Lenihan HS, Brooks AJ, Holbrook SJ, Schmitt RJ, Kendall BE (2018) Predicting  
458 coral community recovery using multi-species population dynamics models. *Ecol Lett*  
459 22:605–615
- 460 Koons DN, Grand JB, Zinner B, Rockwell RF (2005) Transient population dynamics:  
461 Relations to life history and initial population state. *Ecol Modell* 185:283–297



- 462 Lachs L, Sommer B, Cant J, Hodge JM, Pandolfi JM, Beger M (2021) Temperature-related  
463 demographic strategies and post-bleaching recovery potential in an endemic subtropical  
464 coral. *Coral Reefs*
- 465 Lam VYY, Doropoulos C, Bozec YM, Mumby PJ (2020) Resilience concepts and their  
466 application to coral reefs. *Front Ecol Evol* 8:1–14
- 467 Lande R, Engen S, Sther BE (2003) Stochastic population dynamics in ecology and  
468 conservation. Oxford University Press, Oxford
- 469 Lewontin RC, Cohen D (1969) On population growth in a randomly varying environment.  
470 *PNAS* 62:1056–1060
- 471 Linares C, Doak DF (2010) Forecasting the combined effects of disparate disturbances on the  
472 persistence of long-lived gorgonians: A case study of *Paramuricea clavata*. *Mar Ecol*  
473 *Prog Ser* 402:59–68
- 474 Linares C, Doak DF, Coma R, Diaz D, Zabala M (2007) Life history and viability of a long-  
475 lived marine invertebrate: The octocoral *Paramuricea clavata*. *Ecology* 88:918–928
- 476 Mace GM, Collar NJ, Gaston KJ, Hilton-Taylor C, Akçakaya HR, Leader-Williams N,  
477 Milner-Gulland EJ, Stuart SN (2008) Quantification of extinction risk: IUCN’s system  
478 for classifying threatened species. *Conserv Biol* 22:1424–1442
- 479 Madin JS, Hughes TP, Connolly SR (2012) Calcification, Storm Damage and Population  
480 Resilience of Tabular Corals under Climate Change. *PLoS One* 7:1–10
- 481 Maynard JA, McKagan S, Raymundo L, Johnson S, Ahmadi GN, Johnston L, Houk P,  
482 Williams GJ, Kendall M, Heron SF, van Hooidonk R, Mcleod E, Tracey D, Planes S  
483 (2015) Assessing relative resilience potential of coral reefs to inform management. *Biol*  
484 *Conserv* 192:109–119

- 485 McDonald JL, Franco M, Townley S, Ezard THG, Jelbert K, Hodgson DJ (2017) Divergent  
486 demographic strategies of plants in variable environments. *Nat Ecol Evol* 1:1–6
- 487 McDonald JL, Stott I, Townley S, Hodgson DJ (2016) Transients drive the demographic  
488 dynamics of plant populations in variable environments. *J Ecol* 104:306–314
- 489 Mcleod E, Anthony KRN, Mumby PJ, Maynard J, Beeden R, Graham NAJ, Heron SF,  
490 Hoegh-Guldberg O, Jupiter S, MacGowan P, Mangubhai S, Marshall N, Marshall PA,  
491 McClanahan TR, Mcleod K, Nyström M, Obura D, Parker B, Possingham HP, Salm R  
492 V., Tamelander J (2019) The future of resilience-based management in coral reef  
493 ecosystems. *J Environ Manage* 233:291–301
- 494 McLeod E, Shaver EC, Beger M, Koss J, Grimsditch G (2021) Using resilience assessments  
495 to inform the management and conservation of coral reef ecosystems. *J Environ Manage*  
496 277:1–8
- 497 Mercado-Molina AE, Ruiz-Diaz CP, Pérez ME, Rodríguez-Barreras R, Sabat AM (2015)  
498 Demography of the threatened coral *Acropora cervicornis*: implications for its  
499 management and conservation. *Coral Reefs* 34:1113–1124
- 500 Metcalf CJE, Pavard S (2007) Why evolutionary biologists should be demographers. *Trends*  
501 *Ecol Evol* 22:205–212
- 502 Montero-Serra I, Garrabou J, Doak DF, Ledoux JB, Linares C (2019) Marine protected areas  
503 enhance structural complexity but do not buffer the consequences of ocean warming for  
504 an overexploited precious coral. *J Appl Ecol* 56:1063–1074
- 505 Morris WF, Doak DF (2002) Quantitative conservation biology: Theory and practice of  
506 population viability analysis. Sinauer Associates, Inc.,
- 507 Pickett STA, White PS (1985) The ecology of natural disturbance and patch dynamics.

- 508 Academic Press Inc., San Diego, California
- 509 Pisapia C, Edmunds PJ, Moeller H V., Riegl BM, McWilliam M, Wells CD, Pratchett MS  
510 (2020) Projected shifts in coral size structure in the Anthropocene. *Advances in Marine  
511 Biology*. Academic Press, pp 31–60
- 512 Pratchett MS, McWilliam MJ, Riegl B (2020) Contrasting shifts in coral assemblages with  
513 increasing disturbances. *Coral Reefs* 39:783–793
- 514 Pratchett MS, Trapon M, Berumen ML, Chong-Seng K (2011) Recent disturbances augment  
515 community shifts in coral assemblages in Moorea, French Polynesia. *Coral Reefs*  
516 30:183–193
- 517 Precoda K, Baird AH, Madsen A, Mizerek T, Sommer B, Su SN, Madin JS (2018) How does  
518 a widespread reef coral maintain a population in an isolated environment? *Mar Ecol  
519 Prog Ser* 594:85–94
- 520 Ramula S, Rees M, Buckley YM (2009) Integral projection models perform better for small  
521 demographic data sets than matrix population models: A case study of two perennial  
522 herbs. *J Appl Ecol* 46:1048–1053
- 523 Riegl B, Johnston M, Purkis S, Howells E, Burt J, Steiner SCC, Sheppard CRC, Bauman A  
524 (2018) Population collapse dynamics in *Acropora downingi*, an Arabian/Persian Gulf  
525 ecosystem-engineering coral, linked to rising temperature. *Glob Chang Biol* 24:2447–  
526 2462
- 527 Riegl BM (2020) The population dynamics of the coral reef crisis—Prologue. In: Riegl B.M.  
528 (eds) *Population Dynamics of the Reef Crisis*. Academic Press, pp xxxvii–xi
- 529 Riegl BM, Glynn PW (2020) Population dynamics of the reef crisis: Consequences of the  
530 growing human population. *Adv Mar Biol* 87:1–30

- 531 Roche RC, Williams GJ, Turner JR (2018) Towards developing a mechanistic understanding  
532 of coral reef resilience to thermal stress across multiple scales. *Curr Clim Chang Reports*  
533 4:51–64
- 534 Salguero-Gómez R, Casper BB (2010) Keeping plant shrinkage in the demographic loop. *J*  
535 *Ecol* 98:312–323
- 536 Salguero-Gómez R, Shefferson RP, Hutchings MJ (2013) Plants do not count... or do they?  
537 New perspectives on the universality of senescence. *J Ecol* 101:545–554
- 538 Scavo Lord K, Lesneski KC, Bengtsson ZA, Kuhn KM, Madin J, Cheung B, Ewa R, Taylor  
539 JF, Burmester EM, Morey J, Kaufman L, Finnerty JR (2020) Multi-Year viability of a  
540 reef coral population living on mangrove roots suggests an important role for mangroves  
541 in the broader habitat mosaic of corals. *Front Mar Sci* 7:1–16
- 542 Stott I (2016) Perturbation analysis of transient population dynamics using matrix projection  
543 models. *Methods Ecol Evol* 7:666–678
- 544 Stott I, Franco M, Carslake D, Townley S, Hodgson D (2010) Boom or bust? A comparative  
545 analysis of transient population dynamics in plants. *J Ecol* 98:302–311
- 546 Stott I, Hodgson DJ, Townley S (2012) Popdemo: An R package for population demography  
547 using projection matrix analysis. *Methods Ecol Evol* 3:797–802
- 548 Stott I, Townley S, Hodgson D (2011) A framework for studying transient dynamics of  
549 population projection matrix models. *Ecol Lett* 14:959–970
- 550 Sully S, Burkepille DE, Donovan MK, Hodgson G, van Woesik R (2019) A global analysis of  
551 coral bleaching over the past two decades. *Nat Commun* 10:1–5
- 552 van Tienderen PH (2000) Elasticities and the link between demographic and evolutionary  
553 dynamics. *Ecology* 81:666–679

- 554 Townley S, Carslake D, Kellie-Smith O, Mccarthy D, Hodgson D (2007) Predicting transient  
555 amplification in perturbed ecological systems. *J Appl Ecol* 44:
- 556 Townley S, Hodgson DJ (2008) Erratum et addendum: Transient amplification and  
557 attenuation in stage-structured population dynamics. *J Appl Ecol* 45:1836–1839
- 558 Tuljapurkar S (1989) An uncertain life: Demography in random environments. *Theor Popul*  
559 *Biol* 35:227–294
- 560 Tuljapurkar SD, Orzack SH (1980) Population dynamics in variable environments I. Long-  
561 run growth rates and extinction. *Theor Popul Biol* 18:314–342
- 562 Vardi T, Williams DE, Sandin SA (2012) Population dynamics of threatened elkhorn coral in  
563 the northern Florida Keys, USA. *Endanger Species Res* 19:157–169
- 564 Vergés A, McCosker E, Mayer-Pinto M, Coleman MA, Wernberg T, Ainsworth T, Steinberg  
565 PD (2019) Tropicalisation of temperate reefs: Implications for ecosystem functions and  
566 management actions. *Funct Ecol* 1–14
- 567 Williams JL, Ellis MM, Bricker MC, Brodie JF, Parsons EW (2011) Distance to stable stage  
568 distribution in plant populations and implications for near-term population projections. *J*  
569 *Ecol* 99:1171–1178
- 570 Wolff NH, Mumby PJ, Devlin M, Anthony KRN (2018) Vulnerability of the Great Barrier  
571 Reef to climate change and local pressures. *Glob Chang Biol* 24:1978–1991
- 572 Zychaluk K, Bruno JF, Clancy D, McClanahan TR, Spencer M (2012) Data-driven models  
573 for regional coral-reef dynamics. *Ecol Lett* 15:151–158
